# Supplementary material
Source: Springer Nature journal article supplement (https://www.springermedizin.de/resource/supplementary/12891_2010_1132_MOESM3_ESM.pdf/9507210)
Supplement: MOESM3 [file 9507210]

# Syndesmophyte score

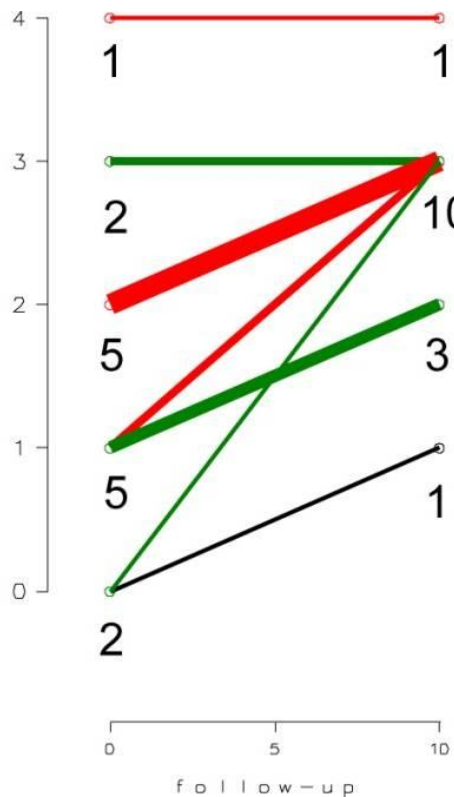

Radiologic grading of ankylosing spondylitis according to Devogelaer, at baseline and follow-up.

| Grade | Radiological severity                                                   |
|-------|-------------------------------------------------------------------------|
| 0     | Isolated sacroiliitis (no syndesmophytes)                               |
| I     | Incipient syndesmophytes                                                |
| II    | Syndesmophytes bridging 1 or 2 intervertebral disc space                |
| III   | Syndesmophytes producing an undulating vertebral contour (bamboo spine) |
| IV    | “trolley track” sign                                                    |
